# Supplementary material
Source: HighWire-hosted journal article supplement (https://ebn.bmj.com/content/suppl/2003/05/07/6.1)
Supplement: 05Mar04.pdf [file 05Mar04.pdf]

## OTHER ARTICLES NOTED (05 Mar 2004)

A list of the journals that are reviewed and the criteria for selecting articles from these journals for inclusion in *Evidence-Based Nursing* are included in each issue. The following articles passed all criteria but were not abstracted because, in the judgment of the editors, their findings were less widely applicable to nursing practice, the topic was of interest to only a select group of nurse specialists, or the topic was recently addressed in another abstract.

### Treatment

Emkey R, Rosenthal N, Wu SC, *et al.* Efficacy and safety of tramadol/acetaminophen tablets (Ultracet) as add-on therapy for osteoarthritis pain in subjects receiving a COX-2 nonsteroidal antiinflammatory drug: a multicenter, randomized, double-blind, placebo-controlled trial. *J Rheumatol* 2004;**31**:150–6.

[http://www.ncbi.nlm.nih.gov/entrez/query.fcgi?cmd=Retrieve&db=PubMed&list\\_uids=14705234&dopt=Abstract](http://www.ncbi.nlm.nih.gov/entrez/query.fcgi?cmd=Retrieve&db=PubMed&list_uids=14705234&dopt=Abstract)

Emmen MJ, Schippers GM, Bleijenberg G, *et al.* Effectiveness of opportunistic brief interventions for problem drinking in a general hospital setting: systematic review. *BMJ* 2004;**328**:318–22.

[http://www.ncbi.nlm.nih.gov/entrez/query.fcgi?cmd=Retrieve&db=PubMed&list\\_uids=14729657&dopt=Abstract](http://www.ncbi.nlm.nih.gov/entrez/query.fcgi?cmd=Retrieve&db=PubMed&list_uids=14729657&dopt=Abstract)

Gowers S, Bryant-Waugh R. Management of child and adolescent eating disorders: the current evidence base and future directions. *J Child Psychol Psychiatry* 2004;**45**:63–83.

[http://www.ncbi.nlm.nih.gov/entrez/query.fcgi?cmd=Retrieve&db=PubMed&list\\_uids=14959803&dopt=Abstract](http://www.ncbi.nlm.nih.gov/entrez/query.fcgi?cmd=Retrieve&db=PubMed&list_uids=14959803&dopt=Abstract)

Schneider SM, Prince-Paul M, Allen MJ, *et al.* Virtual reality as a distraction intervention for women receiving chemotherapy. *Oncol Nurs Forum* 2004;**31**:81–8.

[http://www.ncbi.nlm.nih.gov/entrez/query.fcgi?cmd=Retrieve&db=PubMed&list\\_uids=14722591&dopt=Abstract](http://www.ncbi.nlm.nih.gov/entrez/query.fcgi?cmd=Retrieve&db=PubMed&list_uids=14722591&dopt=Abstract)

### Causation

Albertsen K, Andersen AM, Olsen J, *et al.* Alcohol consumption during pregnancy and the risk of preterm delivery. *Am J Epidemiol* 2004;**159**:155–61.

[http://www.ncbi.nlm.nih.gov/entrez/query.fcgi?cmd=Retrieve&db=PubMed&list\\_uids=14718217&dopt=Abstract](http://www.ncbi.nlm.nih.gov/entrez/query.fcgi?cmd=Retrieve&db=PubMed&list_uids=14718217&dopt=Abstract)

### Clinical prediction guide

Tay SY, Sloan EP, Zun L, *et al.* Comparison of the New Injury Severity Score and the Injury Severity Score. *J Trauma* 2004;**56**:162–4.

[http://www.ncbi.nlm.nih.gov/entrez/query.fcgi?cmd=Retrieve&db=PubMed&list\\_uids=14749583&dopt=Abstract](http://www.ncbi.nlm.nih.gov/entrez/query.fcgi?cmd=Retrieve&db=PubMed&list_uids=14749583&dopt=Abstract)
