# Supplementary material
Source: HighWire-hosted journal article supplement (https://ebn.bmj.com/content/suppl/2003/05/07/6.1)
Supplement: 30Jan04.pdf [file 30Jan04.pdf]

## OTHER ARTICLES NOTED (30 Jan 2004)

A list of the journals that are reviewed and the criteria for selecting articles from these journals for inclusion in *Evidence-Based Nursing* are included in each issue. The following articles passed all criteria but were not abstracted because, in the judgment of the editors, their findings were less widely applicable to nursing practice, the topic was of interest to only a select group of nurse specialists, or the topic was recently addressed in another abstract.

### Treatment

Bollen CW, Uiterwaal CS, van Vught AJ. Cumulative metaanalysis of high-frequency versus conventional ventilation in premature neonates. *Am J Respir Crit Care Med* 2003;**168**:1150–5.  
[http://www.ncbi.nlm.nih.gov/entrez/query.fcgi?cmd=Retrieve&db=PubMed&list\\_uids=14607823&dopt=Abstract](http://www.ncbi.nlm.nih.gov/entrez/query.fcgi?cmd=Retrieve&db=PubMed&list_uids=14607823&dopt=Abstract)

Graffy J, Taylor J, Williams A, *et al.* Randomised controlled trial of support from volunteer counsellors for mothers considering breast feeding. *BMJ* 2004;**328**:26–31.  
[http://www.ncbi.nlm.nih.gov/entrez/query.fcgi?cmd=Retrieve&db=PubMed&list\\_uids=14703543&dopt=Abstract](http://www.ncbi.nlm.nih.gov/entrez/query.fcgi?cmd=Retrieve&db=PubMed&list_uids=14703543&dopt=Abstract)

Husereau D, Clifford T, Aker P, *et al.* *Spinal manipulation for infantile colic*. Ottawa: Canadian Coordinating Office for Health Technology Assessment (CCOHTA), Nov 2003.  
[www.ccohta.ca](http://www.ccohta.ca)

MacKelvie KJ, Khan KM, Petit MA, *et al.* A school-based exercise intervention elicits substantial bone health benefits: a 2-year randomized controlled trial in girls. *Pediatrics* 2003;**112**:e447–52.  
[http://www.ncbi.nlm.nih.gov/entrez/query.fcgi?cmd=Retrieve&db=PubMed&list\\_uids=14654643&dopt=Abstract](http://www.ncbi.nlm.nih.gov/entrez/query.fcgi?cmd=Retrieve&db=PubMed&list_uids=14654643&dopt=Abstract)

McElhaney JE, Gravenstein S, Cole SK, *et al.* A placebo-controlled trial of a proprietary extract of North American ginseng (CVT-E002) to prevent acute respiratory illness in institutionalized older adults. *J Am Geriatr Soc* 2004;**52**:13–9.  
[http://www.ncbi.nlm.nih.gov/entrez/query.fcgi?cmd=Retrieve&db=PubMed&list\\_uids=14687309&dopt=Abstract](http://www.ncbi.nlm.nih.gov/entrez/query.fcgi?cmd=Retrieve&db=PubMed&list_uids=14687309&dopt=Abstract)

Salpeter SR, Greyber E, Pasternak GA, *et al.* Risk of fatal and nonfatal lactic acidosis with metformin use in type 2 diabetes mellitus: systematic review and meta-analysis. *Arch Intern Med* 2003;**163**:2594–602.  
[http://www.ncbi.nlm.nih.gov/entrez/query.fcgi?cmd=Retrieve&db=PubMed&list\\_uids=14638559&dopt=Abstract](http://www.ncbi.nlm.nih.gov/entrez/query.fcgi?cmd=Retrieve&db=PubMed&list_uids=14638559&dopt=Abstract)

Stacey D, Noorani HZ, Fisher A, *et al.* *Telephone triage services: systematic review and a survey of Canadian call centre programs*. Ottawa: Canadian Coordinating Office for Health Technology Assessment, Nov 2003.

[www.ccohta.ca](http://www.ccohta.ca)

Williams ME, Pulliam CC, Hunter R, *et al.* The short-term effect of interdisciplinary medication review on function and cost in ambulatory elderly people. *J Am Geriatr Soc* 2004;**52**:93–8.  
[http://www.ncbi.nlm.nih.gov/entrez/query.fcgi?cmd=Retrieve&db=PubMed&list\\_uids=14687321&dopt=Abstract](http://www.ncbi.nlm.nih.gov/entrez/query.fcgi?cmd=Retrieve&db=PubMed&list_uids=14687321&dopt=Abstract)

Zwart S, Rovers MM, de Melker RA, *et al.* Penicillin for acute sore throat in children: randomised, double blind trial. *BMJ* 2003;**327**:1324–8.  
[http://www.ncbi.nlm.nih.gov/entrez/query.fcgi?cmd=Retrieve&db=PubMed&list\\_uids=14656841&dopt=Abstract](http://www.ncbi.nlm.nih.gov/entrez/query.fcgi?cmd=Retrieve&db=PubMed&list_uids=14656841&dopt=Abstract)

## **Causation**

Allard JP, Aghdassi E, McArthur M, *et al.* Nutrition risk factors for survival in the elderly living in Canadian long-term care facilities. *J Am Geriatr Soc* 2004;**52**:59–65.  
[http://www.ncbi.nlm.nih.gov/entrez/query.fcgi?cmd=Retrieve&db=PubMed&list\\_uids=14687316&dopt=Abstract](http://www.ncbi.nlm.nih.gov/entrez/query.fcgi?cmd=Retrieve&db=PubMed&list_uids=14687316&dopt=Abstract)

## **Clinical prediction guide**

Chunilal SD, Eikelboom JW, Attia J, *et al.* Does this patient have pulmonary embolism? *JAMA* 2003;**290**:2849–58.  
[http://www.ncbi.nlm.nih.gov/entrez/query.fcgi?cmd=Retrieve&db=PubMed&list\\_uids=14657070&dopt=Abstract](http://www.ncbi.nlm.nih.gov/entrez/query.fcgi?cmd=Retrieve&db=PubMed&list_uids=14657070&dopt=Abstract)

Sullivan T, Haider A, DiRusso SM, *et al.* Prediction of mortality in pediatric trauma patients: new injury severity score outperforms Injury Severity Score in the severely injured. *J Trauma* 2003;**55**:1083–8.  
[http://www.ncbi.nlm.nih.gov/entrez/query.fcgi?cmd=Retrieve&db=PubMed&list\\_uids=14676655&dopt=Abstract](http://www.ncbi.nlm.nih.gov/entrez/query.fcgi?cmd=Retrieve&db=PubMed&list_uids=14676655&dopt=Abstract)

## **Qualitative**

Bissell P, Anderson C. Supplying emergency contraception via community pharmacies in the UK: reflections on the experiences of users and providers. *Soc Sci Med* 2003;**57**:2367–78.  
[http://www.ncbi.nlm.nih.gov/entrez/query.fcgi?cmd=Retrieve&db=PubMed&list\\_uids=14572843&dopt=Abstract](http://www.ncbi.nlm.nih.gov/entrez/query.fcgi?cmd=Retrieve&db=PubMed&list_uids=14572843&dopt=Abstract)

Caron CD, Bowers BJ. Deciding whether to continue, share, or relinquish caregiving: caregiver views. *Qual Health Res* 2003;**13**:1252–71.  
[http://www.ncbi.nlm.nih.gov/entrez/query.fcgi?cmd=Retrieve&db=PubMed&list\\_uids=14606412&dopt=Abstract](http://www.ncbi.nlm.nih.gov/entrez/query.fcgi?cmd=Retrieve&db=PubMed&list_uids=14606412&dopt=Abstract)

Espezel HJ, Canam CJ. Parent-nurse interactions: care of hospitalized children. *J Adv Nurs* 2003;**44**:34–41.  
[http://www.ncbi.nlm.nih.gov/entrez/query.fcgi?cmd=Retrieve&db=PubMed&list\\_uids=12956667&dopt=Abstract](http://www.ncbi.nlm.nih.gov/entrez/query.fcgi?cmd=Retrieve&db=PubMed&list_uids=12956667&dopt=Abstract)

Fenaughty AM, Namyniuk L. “Here’s what I’d do...”: condom promotion strategies proposed by high-risk women in Anchorage, Alaska. *Qual Health Res* 2004;**14**:23–38.  
[http://www.ncbi.nlm.nih.gov/entrez/query.fcgi?cmd=Retrieve&db=PubMed&list\\_uids=14725174&dopt=Abstract](http://www.ncbi.nlm.nih.gov/entrez/query.fcgi?cmd=Retrieve&db=PubMed&list_uids=14725174&dopt=Abstract)

Giarelli E. Bringing threat to the fore: participating in lifelong surveillance for genetic risk of cancer. *Oncol Nurs Forum* 2003;**30**:945–55.  
[http://www.ncbi.nlm.nih.gov/entrez/query.fcgi?cmd=Retrieve&db=PubMed&list\\_uids=14603352&dopt=Abstract](http://www.ncbi.nlm.nih.gov/entrez/query.fcgi?cmd=Retrieve&db=PubMed&list_uids=14603352&dopt=Abstract)

Ingram J, Johnson D, Hamid N. South Asian grandmothers’ influence on breast feeding in Bristol. *Midwifery* 2003;**19**:318–27.  
[http://www.ncbi.nlm.nih.gov/entrez/query.fcgi?cmd=Retrieve&db=PubMed&list\\_uids=14623511&dopt=Abstract](http://www.ncbi.nlm.nih.gov/entrez/query.fcgi?cmd=Retrieve&db=PubMed&list_uids=14623511&dopt=Abstract)

Lester H, Titter JQ, England E. Satisfaction with primary care: the perspectives of people with schizophrenia. *Fam Pract* 2003;**20**:508–13.  
[http://www.ncbi.nlm.nih.gov/entrez/query.fcgi?cmd=Retrieve&db=PubMed&list\\_uids=14507789&dopt=Abstract](http://www.ncbi.nlm.nih.gov/entrez/query.fcgi?cmd=Retrieve&db=PubMed&list_uids=14507789&dopt=Abstract)

Lowton K. Only when I cough? Adults’ disclosure of cystic fibrosis. *Qual Health Res* 2004;**14**:167–86.

Meeker MA. Family surrogate decision making at the end of life: seeing them through with care and respect. *Qual Health Res* 2004;**14**:204–25.

Mohr WK. Surfacing the life phases of a mental health support group. *Qual Health Res* 2004;**14**:61–77.  
[http://www.ncbi.nlm.nih.gov/entrez/query.fcgi?cmd=Retrieve&db=PubMed&list\\_uids=14725176&dopt=Abstract](http://www.ncbi.nlm.nih.gov/entrez/query.fcgi?cmd=Retrieve&db=PubMed&list_uids=14725176&dopt=Abstract)

Owen D, Vidal-Alaball J, Mansour M, *et al.* Parent’s opinions on the diagnosis of children under 2 years of age with urinary tract infection. *Fam Pract* 2003;**20**:531–7.  
[http://www.ncbi.nlm.nih.gov/entrez/query.fcgi?cmd=Retrieve&db=PubMed&list\\_uids=14507794&dopt=Abstract](http://www.ncbi.nlm.nih.gov/entrez/query.fcgi?cmd=Retrieve&db=PubMed&list_uids=14507794&dopt=Abstract)

Phinney A, Wallhagen M. Recognizing and understanding the symptoms of type 2 diabetes. *Can J Nurs Res* 2003;**35**:108–24.

Pinto KC. Intersections of gender and age in health care: adapting autonomy and confidentiality for the adolescent girl. *Qual Health Res* 2004;**14**:78–99.

[http://www.ncbi.nlm.nih.gov/entrez/query.fcgi?cmd=Retrieve&db=PubMed&list\\_uids=14725177&dopt=Abstract](http://www.ncbi.nlm.nih.gov/entrez/query.fcgi?cmd=Retrieve&db=PubMed&list_uids=14725177&dopt=Abstract)

Schmidt LA. Patients' perceptions of nursing care in the hospital setting. *J Adv Nurs* 2003;**44**:393–9.

[http://www.ncbi.nlm.nih.gov/entrez/query.fcgi?cmd=Retrieve&db=PubMed&list\\_uids=14651711&dopt=Abstract](http://www.ncbi.nlm.nih.gov/entrez/query.fcgi?cmd=Retrieve&db=PubMed&list_uids=14651711&dopt=Abstract)

Schwarz JK. Understanding and responding to patients' requests for assistance in dying. *J Nurs Scholarsh* 2003;**35**:377–84.

[http://www.ncbi.nlm.nih.gov/entrez/query.fcgi?cmd=Retrieve&db=PubMed&list\\_uids=14735682&dopt=Abstract](http://www.ncbi.nlm.nih.gov/entrez/query.fcgi?cmd=Retrieve&db=PubMed&list_uids=14735682&dopt=Abstract)

Vig EK, Pearlman RA. Quality of life while dying: a qualitative study of terminally ill older men. *J Am Geriatr Soc* 2003;**51**:1595–601.

[http://www.ncbi.nlm.nih.gov/entrez/query.fcgi?cmd=Retrieve&db=PubMed&list\\_uids=14687389&dopt=Abstract](http://www.ncbi.nlm.nih.gov/entrez/query.fcgi?cmd=Retrieve&db=PubMed&list_uids=14687389&dopt=Abstract)

Volker DL. Assisted dying and end-of-life symptom management. *Cancer Nurs* 2003;**26**:392–9.

[http://www.ncbi.nlm.nih.gov/entrez/query.fcgi?cmd=Retrieve&db=PubMed&list\\_uids=14710801&dopt=Abstract](http://www.ncbi.nlm.nih.gov/entrez/query.fcgi?cmd=Retrieve&db=PubMed&list_uids=14710801&dopt=Abstract)

Ward-Griffen C, Bol N, Kim H, *et al.* Relationships between families and registered nurses in long-term-care facilities: a critical analysis. *Can J Nurs Res* 2003;**35**:150–74.
